# Supplementary material
Source: PubMed Central journal article supplement (PMC6741440)
Supplement: NIHMS1531669-supplement-1.pdf [file NIHMS1531669-supplement-1.pdf]

**Supplemental Table 1, Related to Figure 1 and Supplemental Figure 1: Demographics of study participants**

|                                      | <b>Primary Cohort</b>                                            | <b>Secondary Cohort</b>                                          |
|--------------------------------------|------------------------------------------------------------------|------------------------------------------------------------------|
| <b>Baby Sex</b>                      | <b>8:10</b><br>(M:F)                                             | <b>12 :19</b><br>(M:F)                                           |
| <b>Age of Mother</b>                 | <b>33 years</b><br>(range:28-39)                                 | <b>29.9 years</b><br>(range:18-42)                               |
| <b>Gestation Time</b>                | <b>39.5 weeks</b><br>(range:36-42)                               | <b>38.9 weeks</b><br>(range:36-42)                               |
| <b>Delivery Mode</b>                 | <b>10:4:4</b><br>(spontaneous vaginal:induced vaginal:c-section) | <b>10:4:4</b><br>(vaginal:planned C-section:emergency C-section) |
| <b>Race of Mother</b>                | <b>15:2:1</b><br>(Caucasian:Asian:mixed)                         | <b>15:1:15</b><br><b>(Caucasian:Asian:African)</b>               |
| <b>Ethnicity of Mother</b>           | <b>16:2</b><br>(non-hispanic:Hispanic)                           | N/A                                                              |
| <b>Tdap Vaccination</b>              | <b>14:4</b><br>(yes:no)                                          | N/A                                                              |
| <b>Gestation Time at Vaccination</b> | <b>33.9 weeks</b><br>(range:29.3-38.9)                           | N/A                                                              |
